# Supplementary material for: Identification, Classification, and Functional Analysis of AP2/ERF Family Genes in the Desert Moss Bryum argenteum
Source: MDPI journal article supplement (doi:10.3390/ijms19113637), 2018-11-19
Supplement: s1 [file s1]

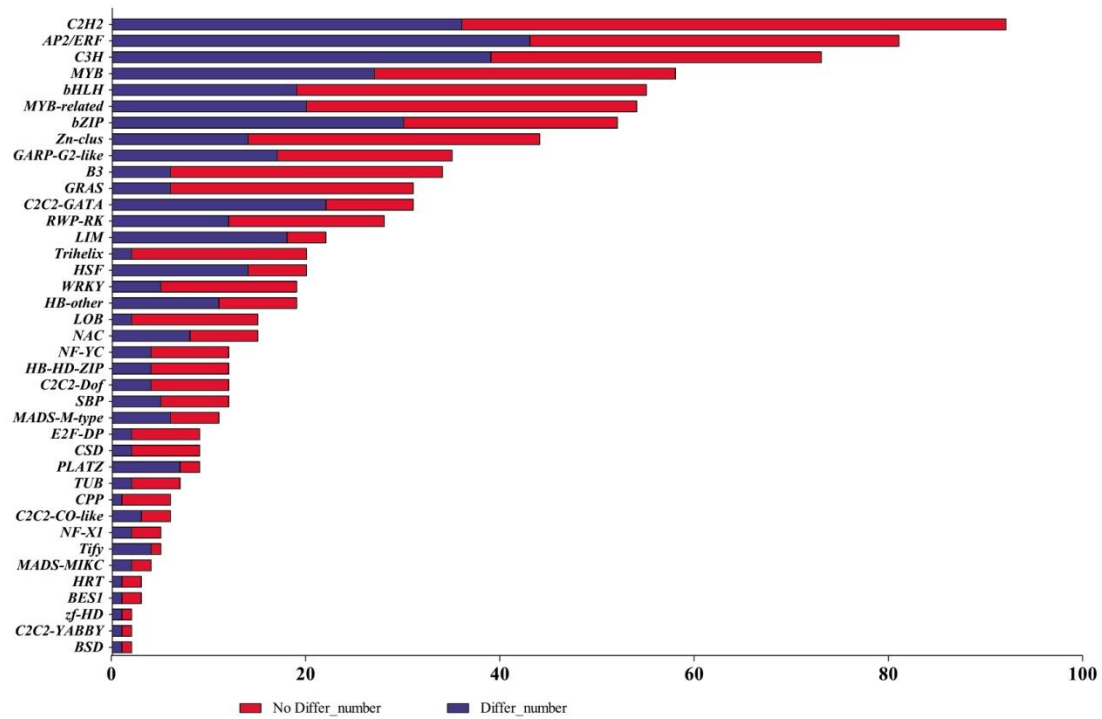

**Supplementary Figure 1.** The 20 most abundant predicted transcription factor families in the *B. argenteum* transcriptome datasets. The differential expressed TF genes (The blue bars) of the total numbers (the red bars) of each TF family during desiccation and rehydration process were shown.



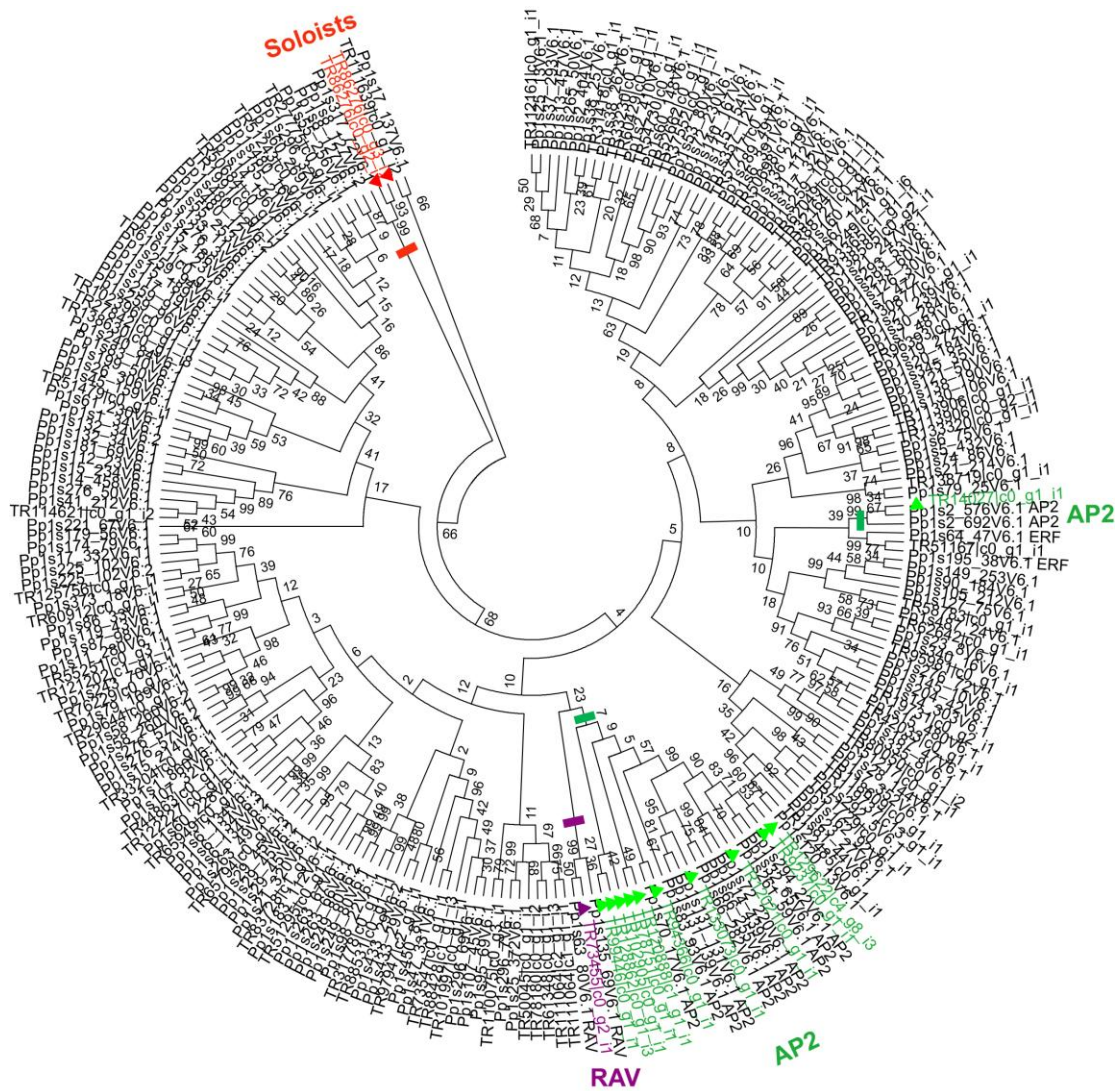

**Supplementary Fig. S3.** Phylogenetic analysis of AP2/ERF family genes in *B. argenteum* and *P.patens*. Eighty-three BaAP2/ERFs and 171PpAP2/ERFs were used to construct the gene tree. The evolutionary distances were computed using the neighbor-joining method and Poisson model with pairwise deletion, 1000 replicates were used to assess the robustness of the tree.
