# Supplementary material for: Identification, Classification, and Functional Analysis of AP2/ERF Family Genes in the Desert Moss Bryum argenteum
Source: MDPI journal article supplement (doi:10.3390/ijms19113637), 2018-11-19
Supplement: s1 [file s1]

**Table S1 Sequence alignment results of 25 Ba-clade DREBs using IKP BLAST.**

|    | Gene              | Length (aa) | Moss Species                     | E-value      | Identity      |
|----|-------------------|-------------|----------------------------------|--------------|---------------|
| 1  | TR125756_c0_g1_i1 | 216         | <i>Funaria</i>                   | 1.59737e-144 | 200/202(100%) |
| 2  | TR60912_c0_g1_i1  | 279         | <i>Funaria</i>                   | 2.57357e-121 | 176/187(95%)  |
| 3  | TR76229_c0_g1_i1  | 284         | <i>Funaria</i>                   | 3.74832e-132 | 211/227(93%)  |
| 4  | TR97947_c2_g1_i1  | 381         | <i>Funaria</i>                   | 0.0          | 319/360(89%)  |
| 5  | TR55251_c0_g3_i1  | 193         | <i>Funaria</i>                   | 1.86953e-87  | 138/156(89%)  |
| 6  | TR65794_c0_g1_i1  | 207         | <i>Racomitrium_varium</i>        | 1.92769e-105 | 164/185(89%)  |
| 7  | TR51295_c0_g1_i1  | 315         | <i>Funaria</i>                   | 1.16271e-85  | 125/143(88%)  |
| 8  | TR88428_c1_g1_i3  | 219         | <i>Racomitrium_varium</i>        | 5.59893e-71  | 101/117(87%)  |
| 9  | TR122227_c0_g1_i1 | 163         | <i>Funaria</i>                   | 1.72466e-72  | 106/123(87%)  |
| 10 | TR44863_c0_g1_i1  | 197         | <i>Funaria</i>                   | 2.08436e-67  | 107/126(85%)  |
| 11 | TR29644_c0_g1_i1  | 273         | <i>Funaria</i>                   | 2.86133e-126 | 180/220(82%)  |
| 12 | TR50045_c0_g1_i1  | 496         | <i>Funaria</i>                   | 0.0          | 277/352(79%)  |
| 13 | TR65949_c0_g1_i1  | 326         | <i>Funaria</i>                   | 1.2845e-180  | 251/325(78%)  |
| 14 | TR101997_c0_g1_i1 | 333         | <i>Racomitrium_varium</i>        | 2.19047e-62  | 97/126(77%)   |
| 15 | TR126346_c7_g1_i1 | 649         | <i>Golenkinia_longispicula</i>   | 1.85319e-35  | 57/78(74%)    |
| 16 | TR121202_c1_g1_i1 | 235         | <i>Neckera_douglasii</i>         | 1.56115e-64  | 118/181(66%)  |
| 17 | TR31778_c0_g1_i1  | 269         | <i>Scouleria_aquatica</i>        | 8.1443e-67   | 104/159(66%)  |
| 18 | TR83728_c1_g1_i2  | 380         | <i>Encalypta_streptocarpa</i>    | 1.88475e-144 | 232/376(62%)  |
| 19 | TR88531_c0_g1_i1  | 232         | <i>Buxbaumia_aphylla</i>         | 2.66208e-32  | 89/144(61%)   |
| 20 | TR111064_c1_g1_i1 | 266         | <i>Neckera_douglasii</i>         | 9.94306e-27  | 60/103(59%)   |
| 21 | TR61348_c0_g1_i1  | 312         | <i>Aulacomnium_heterostichum</i> | 6.56064e-37  | 71/126(57%)   |
| 22 | TR73547_c0_g1_i1  | 345         | <i>Pseudotaxiphyllum_elegans</i> | 8.72126e-64  | 115/205(57%)  |
| 23 | TR111064_c2_g1_i3 | 416         | <i>Neckera_douglasii</i>         | 5.1885e-22   | 50/93(54%)    |
| 24 | TR110075_c0_g3_i1 | 218         | <i>Racomitrium_varium</i>        | 2.30651e-23  | 55/104(53%)   |
| 25 | TR78180_c0_g1_i2  | 260         | <i>Aulacomnium_heterostichum</i> | 8.42958e-27  | 66/140(48%)   |

**Table S2 Primer information of 12 BaAP2/ERF genes for RT-qPCR analysis.**

| Gene               | Subfamily         | Primer sequence (5'→3')                            | Length (bp) |
|--------------------|-------------------|----------------------------------------------------|-------------|
| TR129622 c4_g8_i3  | AP2               | GGTCCTGGAAGTGTCAATCAAC<br>CCAAAGGTGCCAAGGTAGA      | 230         |
| TR119737 c13_g1_i1 | DREB (A-2)        | TCTGGACCGGATTGATTTGGA<br>AACGCTGTCTGATGCTTTGCA     | 151         |
| TR27842 c0_g1_i1   | DREB (A-5)        | CTTCCCAGACTCCATCCCTTCG<br>TTGTCGTCATTTGCGGTTTCC    | 285         |
| TR1991 c0_g3_i1    | DREB (A-5)        | CCGACCACGAGGCTTCAAATC<br>CAATACTGGGCGACAATGGCTTA   | 285         |
| TR42033 c0_g1_i1   | DREB (A-6)        | GTCGAGGTCTGGGTACGTGAGT<br>CGTGGTGGTGACGGAAGTGA     | 238         |
| TR125756 c0_g1_i1  | DREB unclassified | CATTATAGAACACGGGAAGAAAGC<br>ACGGCACCTTATTCAAATCAAA | 272         |
| TR29644 c0_g1_i1   | DREB unclassified | CAACATCGTCGCAGAGTCCA<br>CAGGTTCTTCTTGACACACAGA     | 245         |
| TR113906 c0_g1_i1  | ERF(B1)           | AACGGCACCACCACCCAT<br>TCGTGAGGCTGAGCAAGGA          | 132         |
| TR54730 c0_g1_i1   | ERF(B3)           | GGCTGGGCACTTACGACA                                 | 126         |

|                   |         |                                                |     |
|-------------------|---------|------------------------------------------------|-----|
|                   |         | CGAGGTTGGCTGAGTAGACG                           |     |
| TR138719 c0_g1_i1 | ERF(B6) | AGAGGCGCAGTCGCAGTCA<br>GCAAGATGCCCAGGTTGGAT    | 122 |
| TR86276 c0_g2_i1  | Soloist | ACACTCCTTTCGTTCTTTACT<br>TGGATGATGCCAATCTTAT   | 187 |
| TR86276 c0_g3_i1  | Soloist | ACTTGGGCACCGTTGATT<br>GCTTCTCTTCTTACTCAAGATGGA | 180 |

**Table S3 Primer information of 12 *BaAP2/ERF* genes for gene cloning.**

| Gene               | Primer sequence (5'→3')                          | Product length(bp) | CDS length(bp) | ORF length(aa) |
|--------------------|--------------------------------------------------|--------------------|----------------|----------------|
| TR129622 c4_g8_i3  | TTGAAGGGGGAGAGTGTTGTT<br>TTTCCACCGAGCTCTCCATCA   | 818                | 594            | 198            |
| TR119737 c13_g1_i1 | CTGACATTGCTACAGAGTTCGT<br>AAACCAGCTCCCGGGTCAAT   | 879                | 789            | 263            |
| TR27842 c0_g1_i1   | GATTCGGCAGTGAGCAATTGTA<br>TGCATCTCCAACACCAATATG  | 732                | 618            | 206            |
| TR1991 c0_g3_i1    | ATGCTTGGGATTTGGGAGCTC<br>GATCACGCTCCAAACAATTGTA  | 1131               | 1041           | 347            |
| TR42033 c0_g1_i1   | AGCACGTTTGAAGTTTGTGCG<br>CACCAGAACTGTCAACCAAGAT  | 1561               | 1482           | 494            |
| TR125756 c0_g1_i1  | TTGTGTGTGCAATTGAGACCGT<br>TGATTGCTTGAGTGAAGCTTCA | 757                | 648            | 216            |
| TR29644 c0_g1_i1   | ATCGTGTATTTAGACACGGTGT<br>CGGAATGGTTGCTAATGAAACT | 924                | 819            | 273            |
| TR113906 c0_g1_i1  | TTACATGCGGTGGGAGTACTG<br>ACCTAAGCATGATGTTTGCAAG  | 757                | 699            | 233            |
| TR54730 c0_g1_i1   | TCGAGTGGAGCTAATTCGATC<br>CAGCATCGTCTGCAAGAACGA   | 1134               | 1011           | 337            |
| TR138719 c0_g1_i1  | GTCAGAAGTTCTGTATCTTGCA<br>GTGTCAGCAATCATGTGAAGTA | 802                | 621            | 207            |
| TR86276 c0_g2_i1   | ATCCTACCACGAGCTTCATATC<br>CATAATTCAGTACCATCCACAG | 844                | 759            | 253            |
| TR86276 c0_g3_i1   | ATCCTACCACGAGCTTCATATC<br>GCAGGCTATCATGATAATTCCT | 684                | 612            | 204            |

**Table S4 Primer information of 12 *BaAP2/ERF* genes for fusing to pGBKT7 vector. The vector sequence was labeled in red.**

| Gene               | Primer sequence (5'→3')                                                          |
|--------------------|----------------------------------------------------------------------------------|
| TR129622 c4_g8_i3  | CATGGAGGCCGAATTCATGGAGGTGGTGTCTGAAATT<br>GCAGGTCGACGGATCCCATATACGATTTTGGACAAC    |
| TR119737 c13_g1_i1 | CATGGAGGCCGAATTCATGCAGTTGGGAAACAACAG<br>GCAGGTCGACGGATCCCAATGCTGGTCCCGACC        |
| TR27842 c0_g1_i1   | CATGGAGGCCGAATTCATGGTGGACAACGGCAGGAG<br>GCAGGTCGACGGATCCTCAGGAGAAAGACCAGAGCTC    |
| TR1991 c0_g3_i1    | CATGGAGGCCGAATTCATGGTTGACAAGCAGAGGA<br>GCAGGTCGACGGATCCCTTAAGCTCCGGGGAAGCT       |
| TR42033 c0_g1_i1   | CATGGAGGCCGAATTCATGGCAGCAGTGGCACAC<br>GCAGGTCGACGGATCCCATACACACTGTCTCCAG         |
| TR125756 c0_g1_i1  | CATGGAGGCCGAATTCATGAATTTGACAATATCCAGC<br>GCAGGTCGACGGATCCCTAGCTGGACGAGGGCAC      |
| TR29644 c0_g1_i1   | CATGGAGGCCGAATTCATGTCATCGGGGAAGTGC<br>GCAGGTCGACGGATCCCAATAGAGATAGAAAACGTC       |
| TR113906 c0_g1_i1  | CATGGAGGCCGAATTCATGGGGTCTCGAGAAGGG<br>GCAGGTCGACGGATCCTCAGAAATATACCTCACAAGA      |
| TR54730 c0_g1_i1   | CATGGAGGCCGAATTCATGACCATCATTCCGGGTG<br>GCAGGTCGACGGATCCCTCAGAATGGCGGACTTCG       |
| TR138719 c0_g1_i1  | CATGGAGGCCGAATTCATGTGCAGGAAGATGAGAG<br>GCAGGTCGACGGATCCCTACGCGGAGGCGGCCGT        |
| TR86276 c0_g2_i1   | CATGGAGGCCGAATTCATGGTTAGTATCAGAAAACGG<br>GCAGGTCGACGGATCCCTTATGATGACCTCTTAAATGTT |
| TR86276 c0_g3_i1   | CATGGAGGCCGAATTCATGGTTAGTATCAGAAAACGG<br>GCAGGTCGACGGATCCCTTATGATGAGCATTTGAGAGC  |

**Table S5 Primer information of *BaAP2/ERF* genes for infusing to pYES2 vector. The vector sequences were labeled in red.**

| Gene              | Primer sequence (5'→3')                                                          |
|-------------------|----------------------------------------------------------------------------------|
| TR1991 c0_g3_i1   | CAGTGTGCTGGAATTCATGGTTGACAAGCAGAGGA<br>CATGCTCGAGCGGCCGCTTAAGCTCCGGGGAAGCT       |
| TR29644 c0_g1_i1  | CAGTGTGCTGGAATTCATGTCATCGGGGAAGTGC<br>CATGCTCGAGCGGCCGCTCAATAGAGATAGAAAACGTC     |
| TR54730 c0_g1_i1  | CAGTGTGCTGGAATTCATGACCATCATTCCGGGTG<br>CATGCTCGAGCGGCCGCTCAGAATGGCGGACTTCG       |
| TR138719 c0_g1_i1 | CAGTGTGCTGGAATTCATGTGCAGGAAGATGAGAG<br>CATGCTCGAGCGGCCGCTACGCGGAGGCGGCCGT        |
| TR86276 c0_g2_i1  | CAGTGTGCTGGAATTCATGGTTAGTATCAGAAAACGG<br>CATGCTCGAGCGGCCGCTTATGATGACCTCTTAAATGTT |
| TR86276 c0_g3_i1  | CAGTGTGCTGGAATTCATGGTTAGTATCAGAAAACGG<br>CATGCTCGAGCGGCCGCTTATGATGAGCATTTGAGAGC  |
